# Supplementary material for: An Area-Adaptive Gravity Model Addressing Spatial Heterogeneity in Urban Mobility
Source: Research Square preprint supplement (doi:10.21203/rs.3.rs-8674168/v1), 2026-02-04
Supplement: Supplementary file 1 [file 7f2b906f955aa6594f17638c.docx]

Supplementary Material

Yang Zhang 1, Suoyi Tan 1, Erjian Liu 2, Wenguan Luo 1, Mengning Wang 1,

and Xin Lu 1**[[1]](#footnote-1)†**

**S1 multiple linear regression between CPC value and** ,

**Table S1** Results of the multiple linear regression.

| **Variable** | **Coefficient** | **Std. Error** | **t-value** | **P-value** |
| --- | --- | --- | --- | --- |
| Constant | 0.564 | 0.009 | 60.450 | 0.000 |
| Scale Sum | 0.013 | 0.000 | 29.303 | 0.000 |
| Abs Diff | -0.020 | 0.001 | -27.152 | 0.000 |
| **Model Statistics** |  |  |  |  |
| R-squared | 0.848 |  |  |  |
| Adjusted R-squared | 0.847 |  |  |  |

**S2 Statistical Test on the Effect of the α Parameter**

To assess whether the inclusion of the parameter α introduces a statistically significant effect on the model outcomes, we conducted an independent two-sample t-test comparing the CPC values obtained from the model with α and the version without α. Let

denote the two sets of results. The null hypothesis is that the two conditions yield equal means:

The test returned

Since the p-value is substantially larger than the conventional threshold (0.05), we fail to reject the null hypothesis. This indicates that the inclusion of α does not produce a statistically significant change in CPC performance under the current experimental setting. In other words, the α parameter has no observable effect on the model output for the examined dataset.

**S3 Functional form analysis of gravity model parameters reveals as most predictive**

To further investigate how the fitted parameters of the gravity model vary across different spatial granularities, we tested multiple functional forms relating each parameter to the grid scale. Specifically, we considered additive, multiplicative, polynomial, exponential, and logarithmic transformations of the origin and destination population measures ( and ) as candidate predictors.

Table S4 summarizes the results of fitting each functional form to the parameters , , and , reporting the coefficient estimates along with their statistical significance (p-values). For example, consistently exhibits high coefficients and highly significant p-values () across all three parameters, indicating a strong and robust relationship with spatial scale. In contrast, models based on differences such as or their polynomial/exponential transformations show weak coefficients and non-significant p-values, suggesting minimal explanatory power.

Among all tested forms, the logarithmic interaction form achieved the highest goodness-of-fit (R²) and statistical significance, making it the most suitable functional representation to capture the dependence of gravity model parameters on spatial granularity. This finding justifies the use of in our generalized area-adaptive gravity modeling framework.

**Table S2** Gravity model parameters (, , ) fitted across grid scales using different functional forms of and .
Coefficients and p-values are shown.

| Function style |  |  |  |
| --- | --- | --- | --- |
|  | 0.62(<0.001) | 0.71(<0.001) | 0.66(<0.001) |
|  | 0.73(<0.001) | 0.64(<0.001) | 0.65(<0.001) |
|  | 0.95(<0.001) | 0.96(<0.001) | 0.93(<0.001) |
|  | 0.67(<0.001) | 0.59(<0.001) | 0.59(<0.001) |
|  | -0.07(0.653) | -0.07(0.653) | -0.12(0.408) |
|  | 0.99(<0.001) | 1.00(<0.001) | 0.99(<0.001) |
|  | 0.97(<0.001) | 0.97(<0.001) | 0.95(<0.001) |
|  | -0.04(0.805) | -0.04(0.802) | -0.08(0.562) |
|  | 0.95(<0.001) | 0.96(<0.001) | 0.95(<0.001) |
|  | 0.64(<0.001) | 0.72(<0.001) | 0.69(<0.001) |
|  | 0.74(<0.001) | 0.67(<0.001) | 0.69(<0.001) |
|  | 0.97(<0.001) | 0.97(<0.001) | 0.95(<0.001) |
|  | 0.74(<0.001) | 0.67(<0.001) | 0.69(<0.001) |
|  | 0.03(0.849) | 0.03(0.846) | -0.02(0.885) |
|  | 0.65(<0.001) | 0.73(<0.001) | 0.70(<0.001) |
|  | 0.75(<0.001) | 0.68(<0.001) | 0.70(<0.001) |
|  | 0.97(<0.001) | 0.97(<0.001) | 0.95(<0.001) |
|  | 0.75(<0.001) | 0.68(<0.001) | 0.70(<0.001) |
|  | -0.04(0.805) | -0.04(0.802) | -0.08(0.562) |

**S4 Predicted versus observed flows for AGM, PGM, RM, and PWO models in grid and sub-district scenarios**


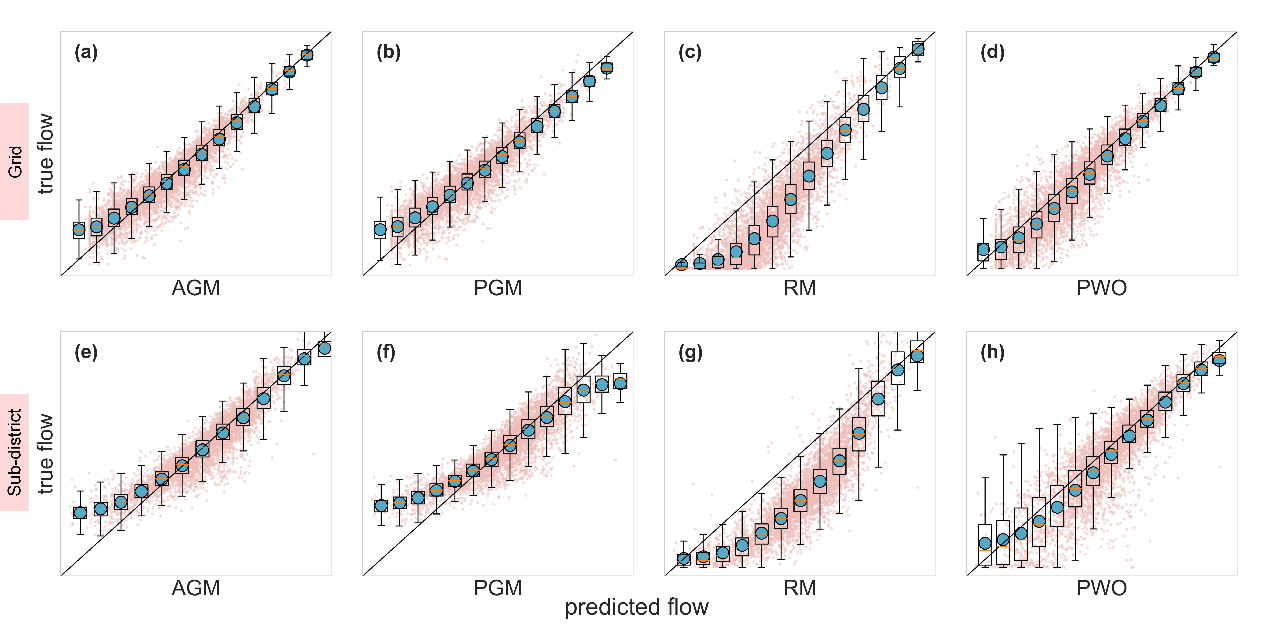


**Fig. S1.** Comparing the observed flows with the predicted flows in grid and street scenarios. (a-d) Flows predicted by PGM, AGM, RM and PWO models in grid scenario. (e-f) Flows predicted by PGM, AGM, RM and PWO models in sub-district scenario. The blue points represent the average number of predicted flows in different bins. The boxplots, obtained via standard statistical methods, represent the distribution of the number of predicted flows in different bins of the number of observed flows.

**S5 Prediction ability of five models in five cities assessed by CPC，PCC, MAE, RMSE**


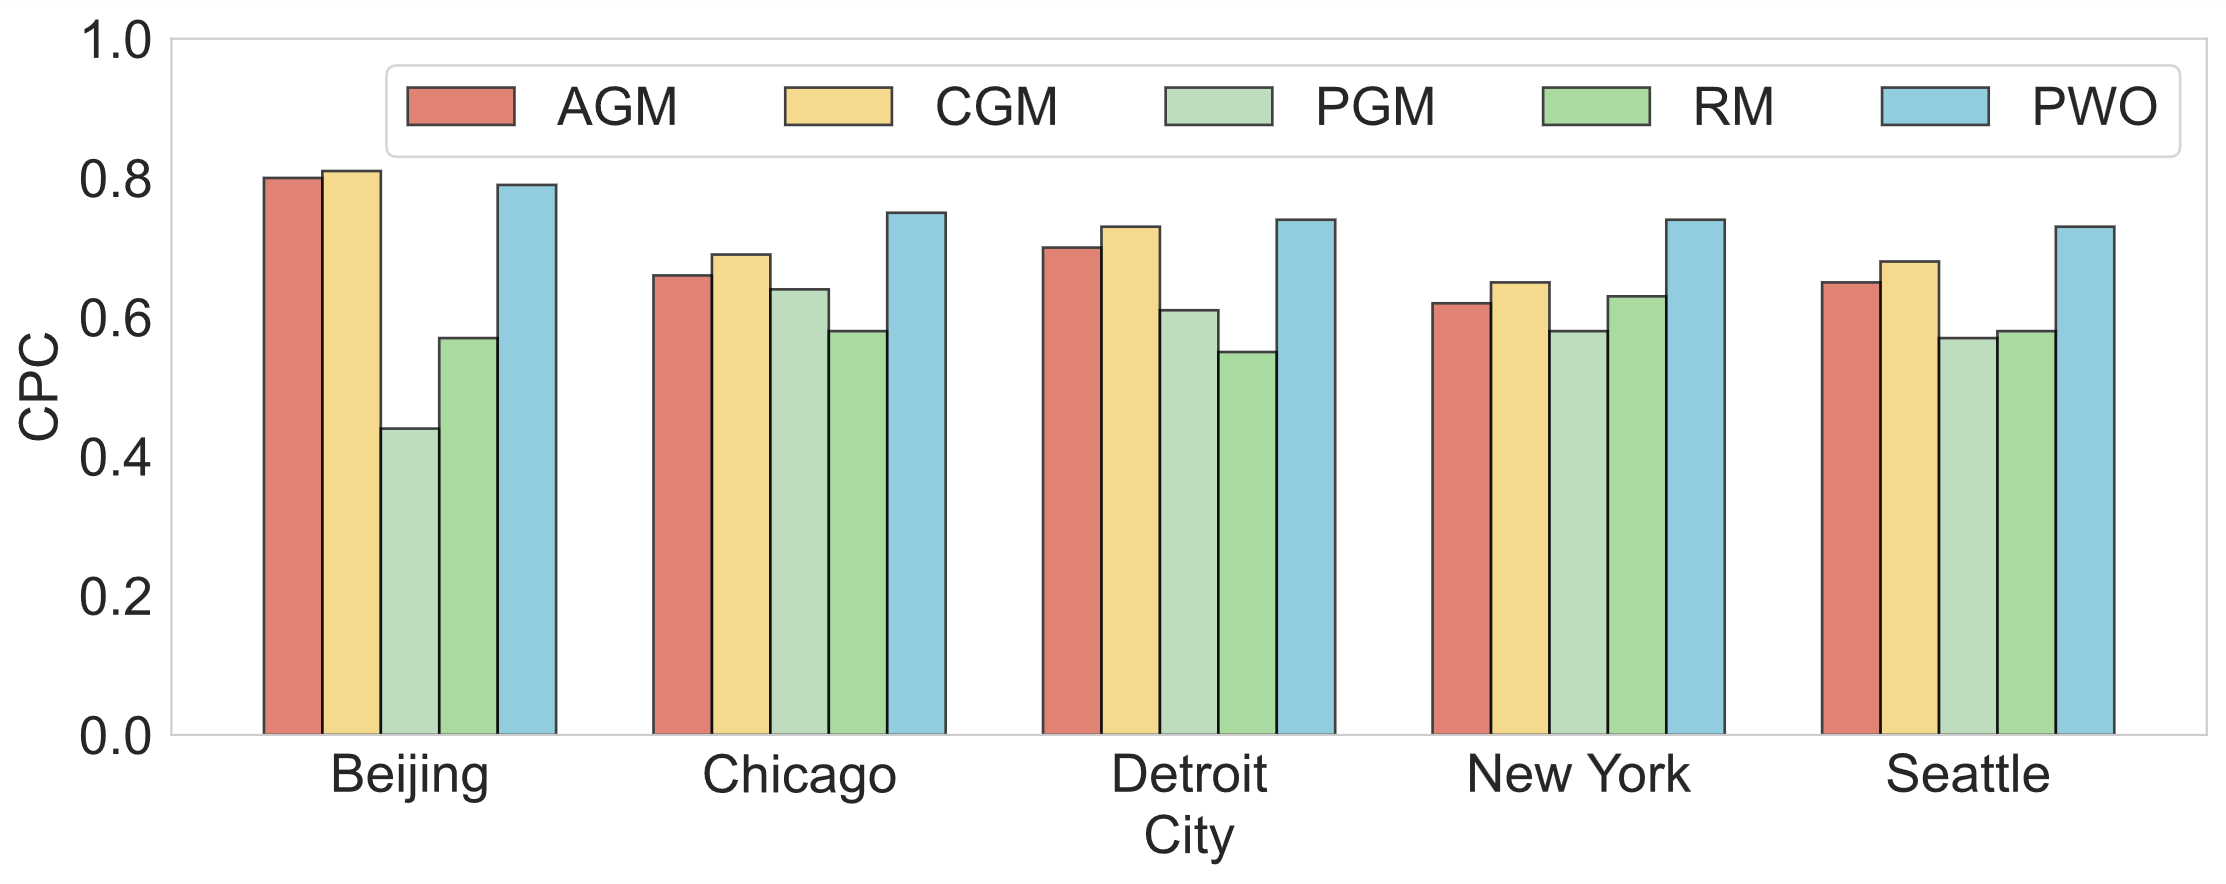
 **Fig. S2.** The prediction ability of five models in five cities in terms of Sørensen similarity index (CPC).


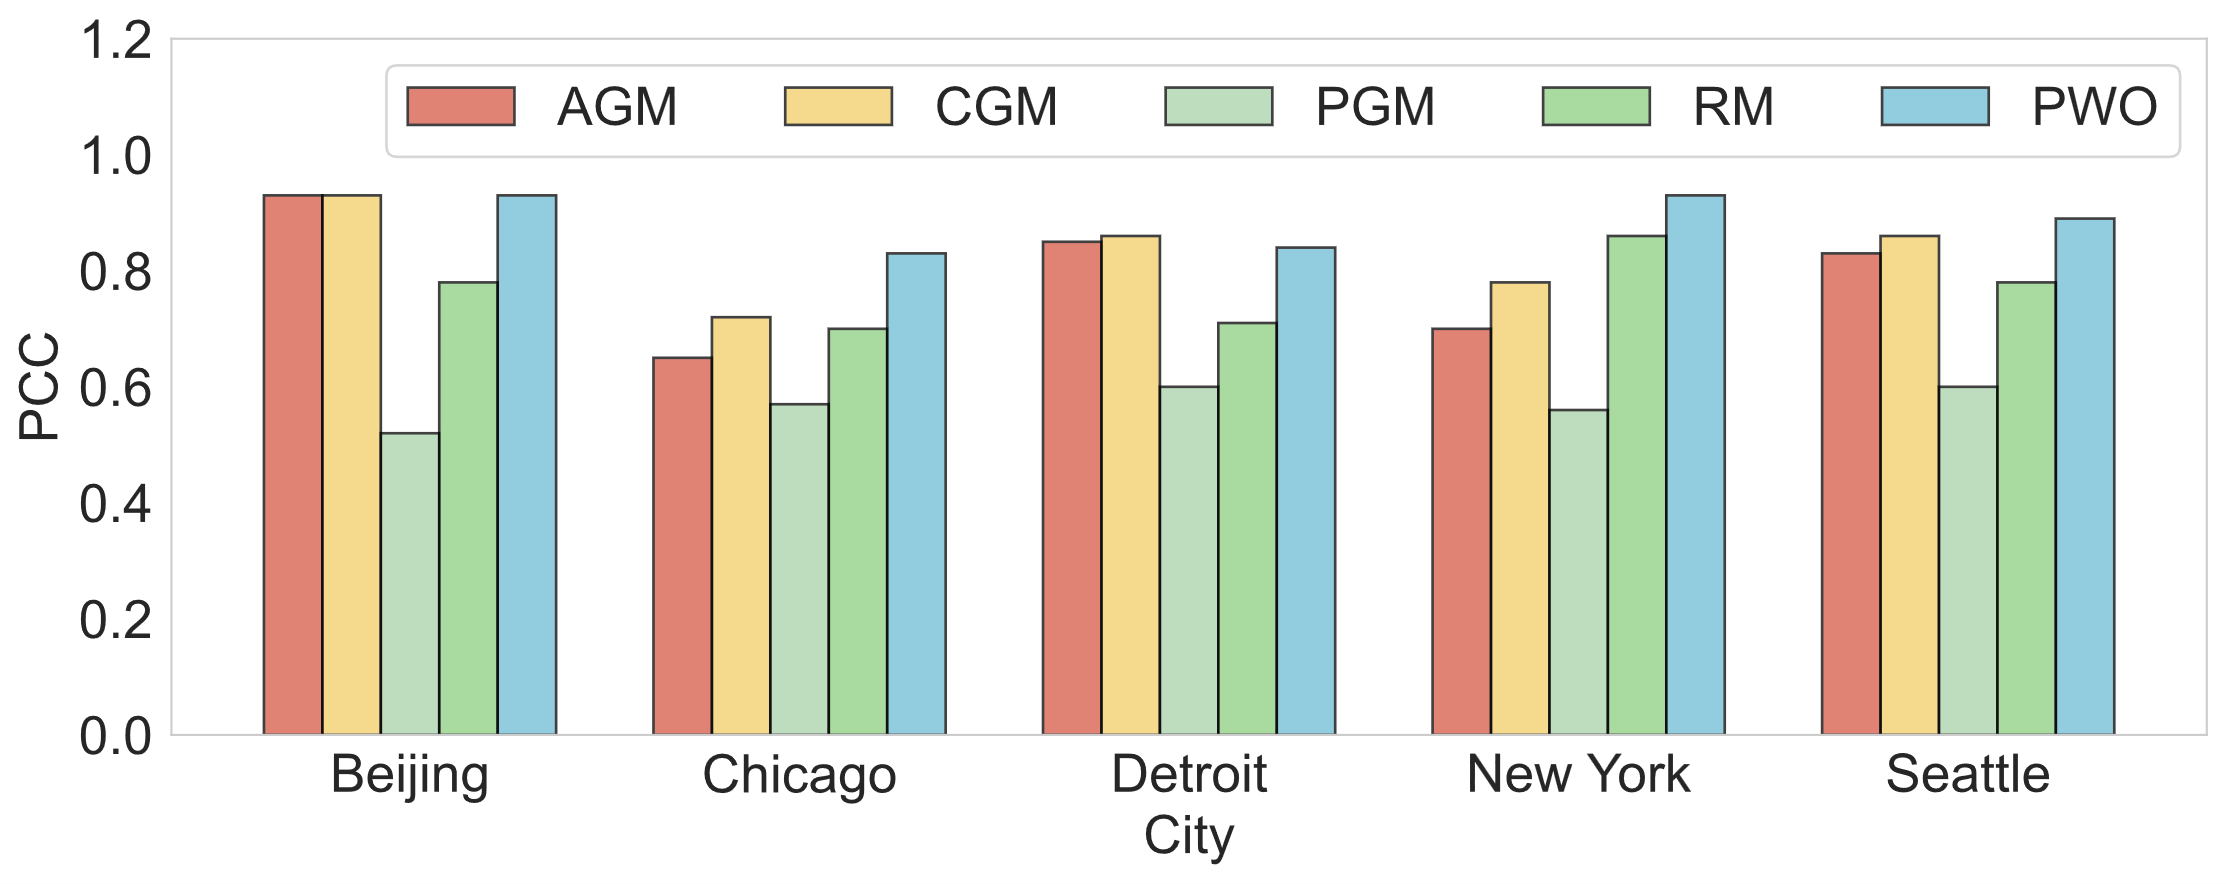
 **Fig. S3.** The prediction ability of five models in five cities in terms of Sørensen similarity index (PCC).
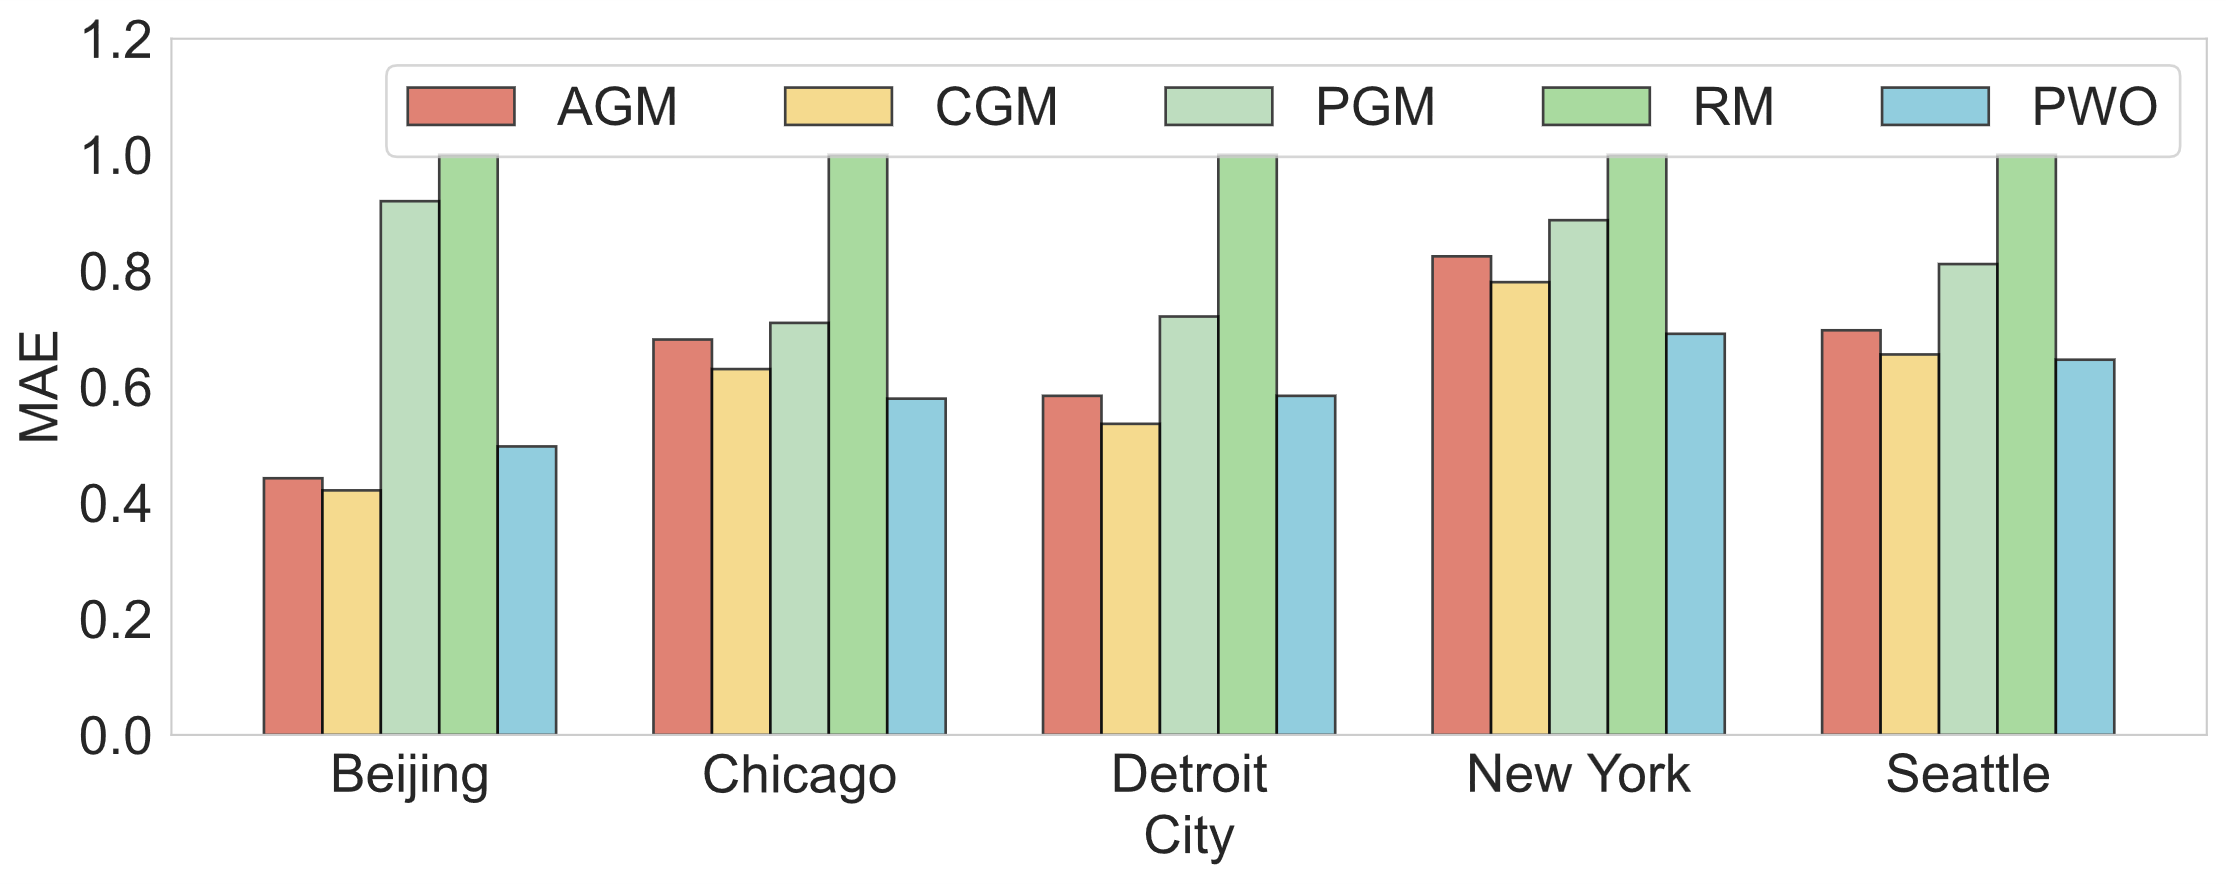
 **Fig. S4.** The prediction ability of five models in five cities in terms of Sørensen similarity index (MAE).
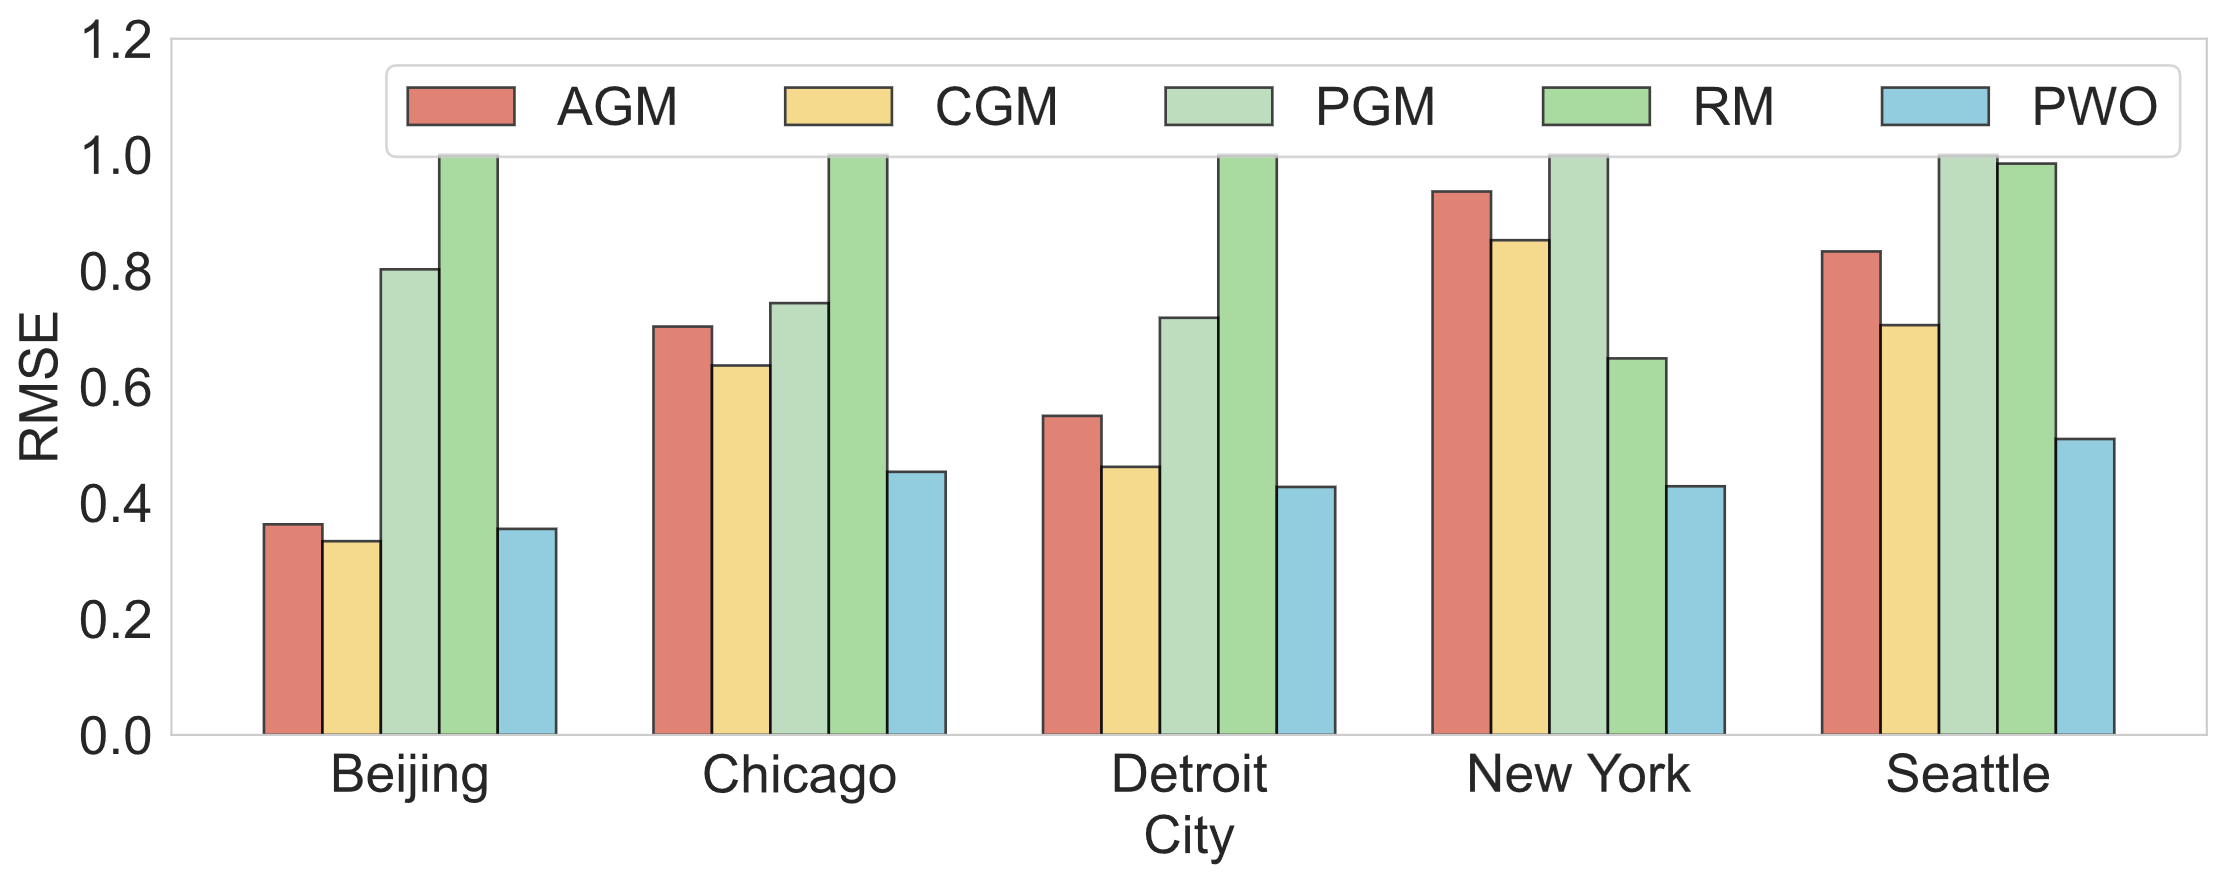
 **Fig. S5.** The prediction ability of five models in five cities in terms of Sørensen similarity index (RMSE).

**S6 The fitted parameters of gravity model in different grid scale.**

**Table S3** The fitted parameters of gravity model in different grid scale with \alpha as a free parameter.

|  |  | CPC |  |  |  |  |  |  |  |
| --- | --- | --- | --- | --- | --- | --- | --- | --- | --- |
| 1 | 1 | 0.39 | 1.60 | 0.25 | 0.26 | 1.04 | 0.00 | 2.00 | 0.00 |
| 1 | 2 | 0.39 | 1.53 | 0.33 | 0.33 | 1.35 | 1.00 | 3.00 | 0.69 |
| 1 | 3 | 0.42 | 1.44 | 0.38 | 0.38 | 1.53 | 2.00 | 4.00 | 1.10 |
| 1 | 4 | 0.45 | 1.18 | 0.42 | 0.43 | 1.65 | 3.00 | 5.00 | 1.39 |
| 1 | 5 | 0.47 | 1.08 | 0.46 | 0.45 | 1.73 | 4.00 | 6.00 | 1.61 |
| 1 | 6 | 0.48 | 0.91 | 0.48 | 0.48 | 1.81 | 5.00 | 7.00 | 1.79 |
| 1 | 7 | 0.49 | 0.72 | 0.51 | 0.50 | 1.83 | 6.00 | 8.00 | 1.95 |
| 1 | 8 | 0.48 | 0.65 | 0.53 | 0.51 | 1.87 | 7.00 | 9.00 | 2.08 |
| 1 | 9 | 0.48 | 0.72 | 0.55 | 0.51 | 1.90 | 8.00 | 10.00 | 2.20 |
| 1 | 10 | 0.49 | 0.00 | 0.57 | 0.57 | 1.92 | 9.00 | 11.00 | 2.30 |
| 1 | 11 | 0.47 | 0.19 | 0.59 | 0.55 | 1.92 | 10.00 | 12.00 | 2.40 |
| 1 | 12 | 0.48 | -0.12 | 0.61 | 0.55 | 1.87 | 11.00 | 13.00 | 2.48 |
| 1 | 13 | 0.46 | -0.88 | 0.60 | 0.62 | 1.89 | 12.00 | 14.00 | 2.56 |
| 1 | 14 | 0.47 | -0.62 | 0.64 | 0.57 | 1.81 | 13.00 | 15.00 | 2.64 |
| 1 | 15 | 0.48 | -1.10 | 0.66 | 0.58 | 1.78 | 14.00 | 16.00 | 2.71 |
| 2 | 1 | 0.39 | 1.56 | 0.33 | 0.33 | 1.35 | 1.00 | 3.00 | 0.69 |
| 2 | 2 | 0.45 | 1.32 | 0.42 | 0.43 | 1.68 | 0.00 | 4.00 | 1.39 |
| 2 | 3 | 0.51 | 1.19 | 0.48 | 0.47 | 1.86 | 1.00 | 5.00 | 1.79 |
| 2 | 4 | 0.56 | 0.94 | 0.52 | 0.52 | 1.97 | 2.00 | 6.00 | 2.08 |
| 2 | 5 | 0.58 | 0.82 | 0.55 | 0.54 | 2.04 | 3.00 | 7.00 | 2.30 |
| 2 | 6 | 0.59 | 0.69 | 0.57 | 0.57 | 2.11 | 4.00 | 8.00 | 2.48 |
| 2 | 7 | 0.59 | 0.41 | 0.60 | 0.58 | 2.11 | 5.00 | 9.00 | 2.64 |
| 2 | 8 | 0.56 | 0.42 | 0.61 | 0.59 | 2.16 | 6.00 | 10.00 | 2.77 |
| 2 | 9 | 0.57 | 0.51 | 0.64 | 0.58 | 2.17 | 7.00 | 11.00 | 2.89 |
| 2 | 10 | 0.54 | -0.18 | 0.65 | 0.64 | 2.20 | 8.00 | 12.00 | 3.00 |
| 2 | 11 | 0.54 | -0.01 | 0.67 | 0.61 | 2.18 | 9.00 | 13.00 | 3.09 |
| 2 | 12 | 0.52 | -0.36 | 0.69 | 0.62 | 2.12 | 10.00 | 14.00 | 3.18 |
| 2 | 13 | 0.50 | -1.24 | 0.67 | 0.71 | 2.16 | 11.00 | 15.00 | 3.26 |
| 2 | 14 | 0.51 | -1.13 | 0.71 | 0.66 | 2.08 | 12.00 | 16.00 | 3.33 |
| 2 | 15 | 0.52 | -1.47 | 0.75 | 0.64 | 2.02 | 13.00 | 17.00 | 3.40 |
| 3 | 1 | 0.42 | 1.49 | 0.37 | 0.39 | 1.53 | 2.00 | 4.00 | 1.10 |
| 3 | 2 | 0.51 | 1.21 | 0.46 | 0.48 | 1.86 | 1.00 | 5.00 | 1.79 |
| 3 | 3 | 0.60 | 1.12 | 0.52 | 0.53 | 2.03 | 0.00 | 6.00 | 2.20 |
| 3 | 4 | 0.63 | 0.88 | 0.56 | 0.57 | 2.13 | 1.00 | 7.00 | 2.48 |
| 3 | 5 | 0.66 | 0.80 | 0.58 | 0.59 | 2.20 | 2.00 | 8.00 | 2.71 |
| 3 | 6 | 0.66 | 0.72 | 0.60 | 0.61 | 2.27 | 3.00 | 9.00 | 2.89 |
| 3 | 7 | 0.66 | 0.36 | 0.63 | 0.63 | 2.26 | 4.00 | 10.00 | 3.04 |
| 3 | 8 | 0.64 | 0.43 | 0.64 | 0.64 | 2.31 | 5.00 | 11.00 | 3.18 |
| 3 | 9 | 0.60 | 0.61 | 0.66 | 0.62 | 2.33 | 6.00 | 12.00 | 3.30 |
| 3 | 10 | 0.61 | -0.15 | 0.67 | 0.68 | 2.35 | 7.00 | 13.00 | 3.40 |
| 3 | 11 | 0.59 | 0.06 | 0.69 | 0.65 | 2.33 | 8.00 | 14.00 | 3.50 |
| 3 | 12 | 0.55 | -0.27 | 0.71 | 0.65 | 2.27 | 9.00 | 15.00 | 3.58 |
| 3 | 13 | 0.55 | -1.12 | 0.69 | 0.75 | 2.33 | 10.00 | 16.00 | 3.66 |
| 3 | 14 | 0.57 | -1.32 | 0.74 | 0.71 | 2.23 | 11.00 | 17.00 | 3.74 |
| 3 | 15 | 0.53 | -1.39 | 0.78 | 0.67 | 2.16 | 12.00 | 18.00 | 3.81 |
| 4 | 1 | 0.45 | 1.29 | 0.41 | 0.43 | 1.65 | 3.00 | 5.00 | 1.39 |
| 4 | 2 | 0.56 | 1.03 | 0.50 | 0.53 | 1.97 | 2.00 | 6.00 | 2.08 |
| 4 | 3 | 0.63 | 0.95 | 0.55 | 0.57 | 2.13 | 1.00 | 7.00 | 2.48 |
| 4 | 4 | 0.71 | 0.79 | 0.59 | 0.60 | 2.23 | 0.00 | 8.00 | 2.77 |
| 4 | 5 | 0.71 | 0.61 | 0.61 | 0.63 | 2.29 | 1.00 | 9.00 | 3.00 |
| 4 | 6 | 0.72 | 0.56 | 0.63 | 0.65 | 2.35 | 2.00 | 10.00 | 3.18 |
| 4 | 7 | 0.72 | 0.14 | 0.65 | 0.67 | 2.35 | 3.00 | 11.00 | 3.33 |
| 4 | 8 | 0.68 | 0.39 | 0.66 | 0.67 | 2.42 | 4.00 | 12.00 | 3.47 |
| 4 | 9 | 0.68 | 0.36 | 0.68 | 0.66 | 2.40 | 5.00 | 13.00 | 3.58 |
| 4 | 10 | 0.65 | -0.26 | 0.69 | 0.71 | 2.43 | 6.00 | 14.00 | 3.69 |
| 4 | 11 | 0.65 | -0.08 | 0.71 | 0.68 | 2.40 | 7.00 | 15.00 | 3.78 |
| 4 | 12 | 0.60 | -0.43 | 0.74 | 0.68 | 2.35 | 8.00 | 16.00 | 3.87 |
| 4 | 13 | 0.58 | -1.22 | 0.71 | 0.78 | 2.41 | 9.00 | 17.00 | 3.95 |
| 4 | 14 | 0.59 | -1.51 | 0.76 | 0.74 | 2.31 | 10.00 | 18.00 | 4.03 |
| 4 | 15 | 0.59 | -1.82 | 0.81 | 0.70 | 2.20 | 11.00 | 19.00 | 4.09 |
| 5 | 1 | 0.46 | 1.22 | 0.43 | 0.46 | 1.73 | 4.00 | 6.00 | 1.61 |
| 5 | 2 | 0.58 | 0.94 | 0.52 | 0.56 | 2.04 | 3.00 | 7.00 | 2.30 |
| 5 | 3 | 0.66 | 0.87 | 0.57 | 0.60 | 2.20 | 2.00 | 8.00 | 2.71 |
| 5 | 4 | 0.71 | 0.62 | 0.61 | 0.63 | 2.29 | 1.00 | 9.00 | 3.00 |
| 5 | 5 | 0.77 | 0.61 | 0.63 | 0.65 | 2.37 | 0.00 | 10.00 | 3.22 |
| 5 | 6 | 0.76 | 0.43 | 0.65 | 0.67 | 2.41 | 1.00 | 11.00 | 3.40 |
| 5 | 7 | 0.76 | 0.01 | 0.68 | 0.69 | 2.42 | 2.00 | 12.00 | 3.56 |
| 5 | 8 | 0.74 | 0.16 | 0.68 | 0.70 | 2.47 | 3.00 | 13.00 | 3.69 |
| 5 | 9 | 0.72 | 0.20 | 0.70 | 0.68 | 2.47 | 4.00 | 14.00 | 3.81 |
| 5 | 10 | 0.67 | -0.26 | 0.71 | 0.73 | 2.51 | 5.00 | 15.00 | 3.91 |
| 5 | 11 | 0.67 | -0.21 | 0.73 | 0.70 | 2.47 | 6.00 | 16.00 | 4.01 |
| 5 | 12 | 0.67 | -0.84 | 0.76 | 0.71 | 2.38 | 7.00 | 17.00 | 4.09 |
| 5 | 13 | 0.63 | -1.37 | 0.72 | 0.80 | 2.48 | 8.00 | 18.00 | 4.17 |
| 5 | 14 | 0.65 | -1.95 | 0.78 | 0.77 | 2.35 | 9.00 | 19.00 | 4.25 |
| 5 | 15 | 0.59 | -1.47 | 0.83 | 0.70 | 2.30 | 10.00 | 20.00 | 4.32 |
| 6 | 1 | 0.48 | 1.06 | 0.47 | 0.49 | 1.82 | 5.00 | 7.00 | 1.79 |
| 6 | 2 | 0.58 | 0.84 | 0.55 | 0.58 | 2.11 | 4.00 | 8.00 | 2.48 |
| 6 | 3 | 0.66 | 0.85 | 0.59 | 0.61 | 2.27 | 3.00 | 9.00 | 2.89 |
| 6 | 4 | 0.72 | 0.62 | 0.63 | 0.65 | 2.36 | 2.00 | 10.00 | 3.18 |
| 6 | 5 | 0.76 | 0.49 | 0.64 | 0.67 | 2.42 | 1.00 | 11.00 | 3.40 |
| 6 | 6 | 0.80 | 0.64 | 0.66 | 0.68 | 2.50 | 0.00 | 12.00 | 3.58 |
| 6 | 7 | 0.78 | 0.07 | 0.68 | 0.71 | 2.48 | 1.00 | 13.00 | 3.74 |
| 6 | 8 | 0.77 | 0.37 | 0.68 | 0.71 | 2.55 | 2.00 | 14.00 | 3.87 |
| 6 | 9 | 0.75 | 0.40 | 0.71 | 0.69 | 2.54 | 3.00 | 15.00 | 3.99 |
| 6 | 10 | 0.74 | -0.32 | 0.72 | 0.75 | 2.55 | 4.00 | 16.00 | 4.09 |
| 6 | 11 | 0.72 | -0.29 | 0.74 | 0.72 | 2.50 | 5.00 | 17.00 | 4.19 |
| 6 | 12 | 0.68 | -0.16 | 0.75 | 0.70 | 2.49 | 6.00 | 18.00 | 4.28 |
| 6 | 13 | 0.70 | -1.01 | 0.72 | 0.81 | 2.56 | 7.00 | 19.00 | 4.36 |
| 6 | 14 | 0.67 | -1.39 | 0.77 | 0.77 | 2.44 | 8.00 | 20.00 | 4.43 |
| 6 | 15 | 0.65 | -1.38 | 0.82 | 0.71 | 2.34 | 9.00 | 21.00 | 4.50 |
| 7 | 1 | 0.48 | 0.90 | 0.47 | 0.52 | 1.83 | 6.00 | 8.00 | 1.95 |
| 7 | 2 | 0.59 | 0.58 | 0.56 | 0.61 | 2.11 | 5.00 | 9.00 | 2.64 |
| 7 | 3 | 0.66 | 0.53 | 0.61 | 0.64 | 2.27 | 4.00 | 10.00 | 3.04 |
| 7 | 4 | 0.71 | 0.21 | 0.65 | 0.67 | 2.36 | 3.00 | 11.00 | 3.33 |
| 7 | 5 | 0.76 | 0.09 | 0.67 | 0.69 | 2.42 | 2.00 | 12.00 | 3.56 |
| 7 | 6 | 0.78 | 0.08 | 0.69 | 0.71 | 2.48 | 1.00 | 13.00 | 3.74 |
| 7 | 7 | 0.81 | 0.06 | 0.70 | 0.72 | 2.53 | 0.00 | 14.00 | 3.89 |
| 7 | 8 | 0.80 | -0.05 | 0.71 | 0.74 | 2.56 | 1.00 | 15.00 | 4.03 |
| 7 | 9 | 0.79 | -0.14 | 0.74 | 0.72 | 2.54 | 2.00 | 16.00 | 4.14 |
| 7 | 10 | 0.78 | -0.73 | 0.75 | 0.76 | 2.55 | 3.00 | 17.00 | 4.25 |
| 7 | 11 | 0.77 | -0.52 | 0.76 | 0.73 | 2.52 | 4.00 | 18.00 | 4.34 |
| 7 | 12 | 0.76 | -1.09 | 0.79 | 0.74 | 2.46 | 5.00 | 19.00 | 4.43 |
| 7 | 13 | 0.72 | -1.30 | 0.74 | 0.82 | 2.57 | 6.00 | 20.00 | 4.51 |
| 7 | 14 | 0.66 | -0.99 | 0.78 | 0.77 | 2.55 | 7.00 | 21.00 | 4.58 |
| 7 | 15 | 0.73 | -2.04 | 0.86 | 0.73 | 2.34 | 8.00 | 22.00 | 4.65 |
| 8 | 1 | 0.48 | 0.75 | 0.50 | 0.54 | 1.88 | 7.00 | 9.00 | 2.08 |
| 8 | 2 | 0.56 | 0.53 | 0.58 | 0.62 | 2.16 | 6.00 | 10.00 | 2.77 |
| 8 | 3 | 0.64 | 0.52 | 0.62 | 0.65 | 2.32 | 5.00 | 11.00 | 3.18 |
| 8 | 4 | 0.68 | 0.39 | 0.66 | 0.67 | 2.42 | 4.00 | 12.00 | 3.47 |
| 8 | 5 | 0.74 | 0.14 | 0.68 | 0.70 | 2.47 | 3.00 | 13.00 | 3.69 |
| 8 | 6 | 0.77 | 0.28 | 0.70 | 0.71 | 2.55 | 2.00 | 14.00 | 3.87 |
| 8 | 7 | 0.80 | -0.13 | 0.72 | 0.73 | 2.55 | 1.00 | 15.00 | 4.03 |
| 8 | 8 | 0.81 | 0.58 | 0.70 | 0.72 | 2.66 | 0.00 | 16.00 | 4.16 |
| 8 | 9 | 0.80 | 0.05 | 0.75 | 0.72 | 2.61 | 1.00 | 17.00 | 4.28 |
| 8 | 10 | 0.80 | -0.23 | 0.75 | 0.76 | 2.65 | 2.00 | 18.00 | 4.38 |
| 8 | 11 | 0.78 | 0.07 | 0.76 | 0.72 | 2.63 | 3.00 | 19.00 | 4.48 |
| 8 | 12 | 0.77 | -0.19 | 0.78 | 0.71 | 2.58 | 4.00 | 20.00 | 4.56 |
| 8 | 13 | 0.74 | -0.66 | 0.74 | 0.81 | 2.66 | 5.00 | 21.00 | 4.64 |
| 8 | 14 | 0.73 | -1.21 | 0.79 | 0.78 | 2.54 | 6.00 | 22.00 | 4.72 |
| 8 | 15 | 0.75 | -1.37 | 0.85 | 0.72 | 2.44 | 7.00 | 23.00 | 4.79 |
| 9 | 1 | 0.47 | 0.88 | 0.49 | 0.56 | 1.91 | 8.00 | 10.00 | 2.20 |
| 9 | 2 | 0.56 | 0.68 | 0.56 | 0.64 | 2.18 | 7.00 | 11.00 | 2.89 |
| 9 | 3 | 0.60 | 0.78 | 0.60 | 0.67 | 2.34 | 6.00 | 12.00 | 3.30 |
| 9 | 4 | 0.68 | 0.38 | 0.64 | 0.70 | 2.41 | 5.00 | 13.00 | 3.58 |
| 9 | 5 | 0.72 | 0.25 | 0.66 | 0.72 | 2.48 | 4.00 | 14.00 | 3.81 |
| 9 | 6 | 0.75 | 0.39 | 0.68 | 0.73 | 2.56 | 3.00 | 15.00 | 3.99 |
| 9 | 7 | 0.79 | -0.15 | 0.70 | 0.75 | 2.54 | 2.00 | 16.00 | 4.14 |
| 9 | 8 | 0.80 | 0.15 | 0.70 | 0.76 | 2.61 | 1.00 | 17.00 | 4.28 |
| 9 | 9 | 0.82 | 0.81 | 0.71 | 0.73 | 2.68 | 0.00 | 18.00 | 4.39 |
| 9 | 10 | 0.82 | -0.37 | 0.73 | 0.79 | 2.64 | 1.00 | 19.00 | 4.50 |
| 9 | 11 | 0.82 | 0.06 | 0.74 | 0.75 | 2.62 | 2.00 | 20.00 | 4.60 |
| 9 | 12 | 0.80 | -0.52 | 0.78 | 0.74 | 2.55 | 3.00 | 21.00 | 4.68 |
| 9 | 13 | 0.78 | -0.37 | 0.71 | 0.82 | 2.69 | 4.00 | 22.00 | 4.76 |
| 9 | 14 | 0.79 | -1.40 | 0.78 | 0.80 | 2.54 | 5.00 | 23.00 | 4.84 |
| 9 | 15 | 0.76 | -1.07 | 0.83 | 0.72 | 2.45 | 6.00 | 24.00 | 4.91 |
| 10 | 1 | 0.48 | 0.19 | 0.55 | 0.58 | 1.93 | 9.00 | 11.00 | 2.30 |
| 10 | 2 | 0.53 | -0.01 | 0.62 | 0.66 | 2.21 | 8.00 | 12.00 | 3.00 |
| 10 | 3 | 0.60 | -0.02 | 0.66 | 0.68 | 2.35 | 7.00 | 13.00 | 3.40 |
| 10 | 4 | 0.65 | -0.27 | 0.69 | 0.71 | 2.44 | 6.00 | 14.00 | 3.69 |
| 10 | 5 | 0.67 | -0.24 | 0.71 | 0.73 | 2.52 | 5.00 | 15.00 | 3.91 |
| 10 | 6 | 0.74 | -0.36 | 0.73 | 0.74 | 2.56 | 4.00 | 16.00 | 4.09 |
| 10 | 7 | 0.78 | -0.80 | 0.75 | 0.76 | 2.56 | 3.00 | 17.00 | 4.25 |
| 10 | 8 | 0.80 | -0.22 | 0.74 | 0.76 | 2.65 | 2.00 | 18.00 | 4.38 |
| 10 | 9 | 0.81 | -0.42 | 0.77 | 0.75 | 2.64 | 1.00 | 19.00 | 4.50 |
| 10 | 10 | 0.84 | -0.12 | 0.75 | 0.77 | 2.71 | 0.00 | 20.00 | 4.61 |
| 10 | 11 | 0.83 | -0.61 | 0.78 | 0.75 | 2.61 | 1.00 | 21.00 | 4.70 |
| 10 | 12 | 0.84 | -1.21 | 0.82 | 0.75 | 2.55 | 2.00 | 22.00 | 4.79 |
| 10 | 13 | 0.81 | -1.07 | 0.77 | 0.83 | 2.70 | 3.00 | 23.00 | 4.87 |
| 10 | 14 | 0.82 | -1.71 | 0.82 | 0.80 | 2.57 | 4.00 | 24.00 | 4.94 |
| 10 | 15 | 0.79 | -1.07 | 0.86 | 0.71 | 2.53 | 5.00 | 25.00 | 5.01 |
| 11 | 1 | 0.47 | 0.34 | 0.53 | 0.59 | 1.93 | 10.00 | 12.00 | 2.40 |
| 11 | 2 | 0.54 | 0.14 | 0.59 | 0.68 | 2.18 | 9.00 | 13.00 | 3.09 |
| 11 | 3 | 0.59 | 0.21 | 0.63 | 0.70 | 2.33 | 8.00 | 14.00 | 3.50 |
| 11 | 4 | 0.65 | -0.14 | 0.66 | 0.73 | 2.40 | 7.00 | 15.00 | 3.78 |
| 11 | 5 | 0.67 | -0.15 | 0.68 | 0.75 | 2.47 | 6.00 | 16.00 | 4.01 |
| 11 | 6 | 0.72 | -0.39 | 0.70 | 0.77 | 2.49 | 5.00 | 17.00 | 4.19 |
| 11 | 7 | 0.77 | -0.60 | 0.71 | 0.78 | 2.51 | 4.00 | 18.00 | 4.34 |
| 11 | 8 | 0.78 | 0.06 | 0.70 | 0.78 | 2.62 | 3.00 | 19.00 | 4.48 |
| 11 | 9 | 0.82 | 0.05 | 0.72 | 0.76 | 2.59 | 2.00 | 20.00 | 4.60 |
| 11 | 10 | 0.82 | -0.57 | 0.73 | 0.80 | 2.60 | 1.00 | 21.00 | 4.70 |
| 11 | 11 | 0.85 | 0.96 | 0.71 | 0.73 | 2.71 | 0.00 | 22.00 | 4.80 |
| 11 | 12 | 0.83 | -1.03 | 0.77 | 0.77 | 2.46 | 1.00 | 23.00 | 4.88 |
| 11 | 13 | 0.83 | -0.57 | 0.72 | 0.84 | 2.66 | 2.00 | 24.00 | 4.96 |
| 11 | 14 | 0.84 | -0.95 | 0.76 | 0.80 | 2.56 | 3.00 | 25.00 | 5.04 |
| 11 | 15 | 0.82 | -1.25 | 0.82 | 0.73 | 2.39 | 4.00 | 26.00 | 5.11 |
| 12 | 1 | 0.47 | 0.09 | 0.53 | 0.61 | 1.88 | 11.00 | 13.00 | 2.48 |
| 12 | 2 | 0.51 | -0.13 | 0.59 | 0.70 | 2.13 | 10.00 | 14.00 | 3.18 |
| 12 | 3 | 0.55 | -0.05 | 0.63 | 0.72 | 2.28 | 9.00 | 15.00 | 3.58 |
| 12 | 4 | 0.59 | -0.37 | 0.66 | 0.75 | 2.35 | 8.00 | 16.00 | 3.87 |
| 12 | 5 | 0.67 | -0.73 | 0.68 | 0.78 | 2.38 | 7.00 | 17.00 | 4.09 |
| 12 | 6 | 0.68 | -0.15 | 0.68 | 0.78 | 2.49 | 6.00 | 18.00 | 4.28 |
| 12 | 7 | 0.76 | -1.06 | 0.71 | 0.81 | 2.45 | 5.00 | 19.00 | 4.43 |
| 12 | 8 | 0.77 | -0.07 | 0.69 | 0.80 | 2.58 | 4.00 | 20.00 | 4.56 |
| 12 | 9 | 0.80 | -0.37 | 0.72 | 0.78 | 2.53 | 3.00 | 21.00 | 4.68 |
| 12 | 10 | 0.84 | -0.92 | 0.72 | 0.83 | 2.54 | 2.00 | 22.00 | 4.79 |
| 12 | 11 | 0.83 | -0.87 | 0.74 | 0.79 | 2.47 | 1.00 | 23.00 | 4.88 |
| 12 | 12 | 0.86 | -0.06 | 0.75 | 0.76 | 2.59 | 0.00 | 24.00 | 4.97 |
| 12 | 13 | 0.83 | -1.34 | 0.73 | 0.86 | 2.55 | 1.00 | 25.00 | 5.05 |
| 12 | 14 | 0.85 | -1.56 | 0.77 | 0.83 | 2.51 | 2.00 | 26.00 | 5.12 |
| 12 | 15 | 0.84 | -1.44 | 0.82 | 0.75 | 2.40 | 3.00 | 27.00 | 5.19 |
| 13 | 1 | 0.45 | -0.75 | 0.61 | 0.60 | 1.90 | 12.00 | 14.00 | 2.56 |
| 13 | 2 | 0.50 | -1.14 | 0.70 | 0.68 | 2.17 | 11.00 | 15.00 | 3.26 |
| 13 | 3 | 0.55 | -1.07 | 0.74 | 0.69 | 2.34 | 10.00 | 16.00 | 3.66 |
| 13 | 4 | 0.58 | -1.31 | 0.77 | 0.73 | 2.42 | 9.00 | 17.00 | 3.95 |
| 13 | 5 | 0.62 | -1.47 | 0.79 | 0.75 | 2.48 | 8.00 | 18.00 | 4.17 |
| 13 | 6 | 0.70 | -1.11 | 0.80 | 0.75 | 2.56 | 7.00 | 19.00 | 4.36 |
| 13 | 7 | 0.73 | -1.38 | 0.81 | 0.76 | 2.56 | 6.00 | 20.00 | 4.51 |
| 13 | 8 | 0.74 | -0.72 | 0.80 | 0.76 | 2.66 | 5.00 | 21.00 | 4.64 |
| 13 | 9 | 0.78 | -0.45 | 0.81 | 0.73 | 2.68 | 4.00 | 22.00 | 4.76 |
| 13 | 10 | 0.80 | -1.14 | 0.82 | 0.79 | 2.68 | 3.00 | 23.00 | 4.87 |
| 13 | 11 | 0.82 | -0.63 | 0.83 | 0.74 | 2.67 | 2.00 | 24.00 | 4.96 |
| 13 | 12 | 0.83 | -1.58 | 0.87 | 0.75 | 2.56 | 1.00 | 25.00 | 5.05 |
| 13 | 13 | 0.85 | 1.45 | 0.74 | 0.74 | 2.94 | 0.00 | 26.00 | 5.13 |
| 13 | 14 | 0.84 | -1.01 | 0.83 | 0.78 | 2.67 | 1.00 | 27.00 | 5.20 |
| 13 | 15 | 0.84 | -1.53 | 0.89 | 0.72 | 2.54 | 2.00 | 28.00 | 5.27 |
| 14 | 1 | 0.47 | -0.35 | 0.54 | 0.65 | 1.79 | 13.00 | 15.00 | 2.64 |
| 14 | 2 | 0.51 | -0.97 | 0.63 | 0.73 | 2.06 | 12.00 | 16.00 | 3.33 |
| 14 | 3 | 0.56 | -1.18 | 0.68 | 0.75 | 2.20 | 11.00 | 17.00 | 3.74 |
| 14 | 4 | 0.58 | -1.62 | 0.73 | 0.78 | 2.29 | 10.00 | 18.00 | 4.03 |
| 14 | 5 | 0.65 | -1.94 | 0.75 | 0.81 | 2.32 | 9.00 | 19.00 | 4.25 |
| 14 | 6 | 0.67 | -1.49 | 0.75 | 0.80 | 2.42 | 8.00 | 20.00 | 4.43 |
| 14 | 7 | 0.66 | -1.03 | 0.75 | 0.81 | 2.53 | 7.00 | 21.00 | 4.58 |
| 14 | 8 | 0.72 | -1.38 | 0.76 | 0.82 | 2.53 | 6.00 | 22.00 | 4.72 |
| 14 | 9 | 0.78 | -1.55 | 0.79 | 0.81 | 2.52 | 5.00 | 23.00 | 4.84 |
| 14 | 10 | 0.81 | -1.69 | 0.78 | 0.84 | 2.55 | 4.00 | 24.00 | 4.94 |
| 14 | 11 | 0.82 | -1.07 | 0.79 | 0.79 | 2.55 | 3.00 | 25.00 | 5.04 |
| 14 | 12 | 0.84 | -1.75 | 0.82 | 0.79 | 2.49 | 2.00 | 26.00 | 5.12 |
| 14 | 13 | 0.83 | -1.02 | 0.76 | 0.85 | 2.66 | 1.00 | 27.00 | 5.20 |
| 14 | 14 | 0.86 | 0.58 | 0.76 | 0.78 | 2.82 | 0.00 | 28.00 | 5.28 |
| 14 | 15 | 0.85 | -1.22 | 0.84 | 0.76 | 2.54 | 1.00 | 29.00 | 5.35 |
| 15 | 1 | 0.47 | -0.76 | 0.55 | 0.67 | 1.78 | 14.00 | 16.00 | 2.71 |
| 15 | 2 | 0.52 | -1.21 | 0.62 | 0.76 | 2.01 | 13.00 | 17.00 | 3.40 |
| 15 | 3 | 0.53 | -1.13 | 0.64 | 0.79 | 2.16 | 12.00 | 18.00 | 3.81 |
| 15 | 4 | 0.59 | -1.77 | 0.68 | 0.83 | 2.19 | 11.00 | 19.00 | 4.09 |
| 15 | 5 | 0.59 | -1.49 | 0.67 | 0.86 | 2.29 | 10.00 | 20.00 | 4.32 |
| 15 | 6 | 0.65 | -1.42 | 0.68 | 0.85 | 2.32 | 9.00 | 21.00 | 4.50 |
| 15 | 7 | 0.73 | -2.07 | 0.70 | 0.88 | 2.30 | 8.00 | 22.00 | 4.65 |
| 15 | 8 | 0.75 | -1.49 | 0.69 | 0.88 | 2.41 | 7.00 | 23.00 | 4.79 |
| 15 | 9 | 0.76 | -1.05 | 0.69 | 0.85 | 2.43 | 6.00 | 24.00 | 4.91 |
| 15 | 10 | 0.79 | -0.87 | 0.68 | 0.87 | 2.51 | 5.00 | 25.00 | 5.01 |
| 15 | 11 | 0.82 | -1.26 | 0.71 | 0.84 | 2.37 | 4.00 | 26.00 | 5.11 |
| 15 | 12 | 0.84 | -1.50 | 0.73 | 0.84 | 2.38 | 3.00 | 27.00 | 5.19 |
| 15 | 13 | 0.84 | -1.50 | 0.70 | 0.91 | 2.51 | 2.00 | 28.00 | 5.27 |
| 15 | 14 | 0.86 | -1.28 | 0.74 | 0.87 | 2.53 | 1.00 | 29.00 | 5.35 |
| 15 | 15 | 0.87 | 1.25 | 0.72 | 0.74 | 2.69 | 0.00 | 30.00 | 5.42 |

**Table S4** The fitted parameters of gravity model in different grid scale with as a fixed parameter.

|  |  | CPC |  |  |  |  |  |  |  |
| --- | --- | --- | --- | --- | --- | --- | --- | --- | --- |
| 1 | 1 | 0.38 | 1 | 0.32 | 0.33 | 0.93 | 0.00 | 2.00 | 0.00 |
| 1 | 2 | 0.39 | 1 | 0.38 | 0.42 | 1.24 | 1.00 | 3.00 | 0.69 |
| 1 | 3 | 0.41 | 1 | 0.42 | 0.46 | 1.43 | 2.00 | 4.00 | 1.10 |
| 1 | 4 | 0.45 | 1 | 0.45 | 0.49 | 1.57 | 3.00 | 5.00 | 1.39 |
| 1 | 5 | 0.47 | 1 | 0.48 | 0.51 | 1.65 | 4.00 | 6.00 | 1.61 |
| 1 | 6 | 0.49 | 1 | 0.50 | 0.53 | 1.75 | 5.00 | 7.00 | 1.79 |
| 1 | 7 | 0.49 | 1 | 0.52 | 0.53 | 1.78 | 6.00 | 8.00 | 1.95 |
| 1 | 8 | 0.49 | 1 | 0.54 | 0.54 | 1.82 | 7.00 | 9.00 | 2.08 |
| 1 | 9 | 0.49 | 1 | 0.56 | 0.54 | 1.85 | 8.00 | 10.00 | 2.20 |
| 1 | 10 | 0.49 | 1 | 0.57 | 0.57 | 1.92 | 9.00 | 11.00 | 2.30 |
| 1 | 11 | 0.48 | 1 | 0.59 | 0.56 | 1.91 | 10.00 | 12.00 | 2.40 |
| 1 | 12 | 0.47 | 1 | 0.60 | 0.55 | 1.88 | 11.00 | 13.00 | 2.48 |
| 1 | 13 | 0.44 | 1 | 0.58 | 0.58 | 1.95 | 12.00 | 14.00 | 2.56 |
| 1 | 14 | 0.47 | 1 | 0.63 | 0.54 | 1.85 | 13.00 | 15.00 | 2.64 |
| 1 | 15 | 0.46 | 1 | 0.65 | 0.53 | 1.85 | 14.00 | 16.00 | 2.71 |
| 2 | 1 | 0.39 | 1 | 0.41 | 0.39 | 1.24 | 1.00 | 3.00 | 0.69 |
| 2 | 2 | 0.45 | 1 | 0.47 | 0.48 | 1.59 | 0.00 | 4.00 | 1.39 |
| 2 | 3 | 0.50 | 1 | 0.52 | 0.52 | 1.77 | 1.00 | 5.00 | 1.79 |
| 2 | 4 | 0.57 | 1 | 0.55 | 0.56 | 1.90 | 2.00 | 6.00 | 2.08 |
| 2 | 5 | 0.59 | 1 | 0.57 | 0.58 | 1.97 | 3.00 | 7.00 | 2.30 |
| 2 | 6 | 0.59 | 1 | 0.59 | 0.60 | 2.05 | 4.00 | 8.00 | 2.48 |
| 2 | 7 | 0.59 | 1 | 0.61 | 0.60 | 2.08 | 5.00 | 9.00 | 2.64 |
| 2 | 8 | 0.57 | 1 | 0.62 | 0.61 | 2.12 | 6.00 | 10.00 | 2.77 |
| 2 | 9 | 0.57 | 1 | 0.65 | 0.60 | 2.13 | 7.00 | 11.00 | 2.89 |
| 2 | 10 | 0.54 | 1 | 0.64 | 0.63 | 2.21 | 8.00 | 12.00 | 3.00 |
| 2 | 11 | 0.54 | 1 | 0.67 | 0.61 | 2.18 | 9.00 | 13.00 | 3.09 |
| 2 | 12 | 0.51 | 1 | 0.68 | 0.60 | 2.15 | 10.00 | 14.00 | 3.18 |
| 2 | 13 | 0.48 | 1 | 0.65 | 0.65 | 2.25 | 11.00 | 15.00 | 3.26 |
| 2 | 14 | 0.49 | 1 | 0.69 | 0.61 | 2.17 | 12.00 | 16.00 | 3.33 |
| 2 | 15 | 0.50 | 1 | 0.73 | 0.58 | 2.12 | 13.00 | 17.00 | 3.40 |
| 3 | 1 | 0.41 | 1 | 0.45 | 0.43 | 1.42 | 2.00 | 4.00 | 1.10 |
| 3 | 2 | 0.50 | 1 | 0.52 | 0.53 | 1.76 | 1.00 | 5.00 | 1.79 |
| 3 | 3 | 0.59 | 1 | 0.56 | 0.57 | 1.95 | 0.00 | 6.00 | 2.20 |
| 3 | 4 | 0.64 | 1 | 0.59 | 0.60 | 2.06 | 1.00 | 7.00 | 2.48 |
| 3 | 5 | 0.67 | 1 | 0.61 | 0.62 | 2.13 | 2.00 | 8.00 | 2.71 |
| 3 | 6 | 0.67 | 1 | 0.62 | 0.64 | 2.21 | 3.00 | 9.00 | 2.89 |
| 3 | 7 | 0.66 | 1 | 0.64 | 0.64 | 2.24 | 4.00 | 10.00 | 3.04 |
| 3 | 8 | 0.65 | 1 | 0.65 | 0.66 | 2.27 | 5.00 | 11.00 | 3.18 |
| 3 | 9 | 0.61 | 1 | 0.67 | 0.65 | 2.28 | 6.00 | 12.00 | 3.30 |
| 3 | 10 | 0.61 | 1 | 0.67 | 0.67 | 2.36 | 7.00 | 13.00 | 3.40 |
| 3 | 11 | 0.59 | 1 | 0.69 | 0.65 | 2.32 | 8.00 | 14.00 | 3.50 |
| 3 | 12 | 0.55 | 1 | 0.71 | 0.64 | 2.29 | 9.00 | 15.00 | 3.58 |
| 3 | 13 | 0.54 | 1 | 0.66 | 0.71 | 2.42 | 10.00 | 16.00 | 3.66 |
| 3 | 14 | 0.55 | 1 | 0.71 | 0.66 | 2.33 | 11.00 | 17.00 | 3.74 |
| 3 | 15 | 0.51 | 1 | 0.75 | 0.61 | 2.26 | 12.00 | 18.00 | 3.81 |
| 4 | 1 | 0.45 | 1 | 0.48 | 0.46 | 1.56 | 3.00 | 5.00 | 1.39 |
| 4 | 2 | 0.56 | 1 | 0.55 | 0.56 | 1.89 | 2.00 | 6.00 | 2.08 |
| 4 | 3 | 0.63 | 1 | 0.59 | 0.60 | 2.05 | 1.00 | 7.00 | 2.48 |
| 4 | 4 | 0.71 | 1 | 0.61 | 0.63 | 2.17 | 0.00 | 8.00 | 2.77 |
| 4 | 5 | 0.72 | 1 | 0.63 | 0.65 | 2.24 | 1.00 | 9.00 | 3.00 |
| 4 | 6 | 0.73 | 1 | 0.65 | 0.67 | 2.31 | 2.00 | 10.00 | 3.18 |
| 4 | 7 | 0.72 | 1 | 0.66 | 0.67 | 2.34 | 3.00 | 11.00 | 3.33 |
| 4 | 8 | 0.68 | 1 | 0.67 | 0.69 | 2.38 | 4.00 | 12.00 | 3.47 |
| 4 | 9 | 0.68 | 1 | 0.69 | 0.67 | 2.37 | 5.00 | 13.00 | 3.58 |
| 4 | 10 | 0.65 | 1 | 0.69 | 0.70 | 2.46 | 6.00 | 14.00 | 3.69 |
| 4 | 11 | 0.64 | 1 | 0.71 | 0.68 | 2.41 | 7.00 | 15.00 | 3.78 |
| 4 | 12 | 0.59 | 1 | 0.73 | 0.66 | 2.39 | 8.00 | 16.00 | 3.87 |
| 4 | 13 | 0.56 | 1 | 0.68 | 0.73 | 2.51 | 9.00 | 17.00 | 3.95 |
| 4 | 14 | 0.57 | 1 | 0.72 | 0.69 | 2.44 | 10.00 | 18.00 | 4.03 |
| 4 | 15 | 0.57 | 1 | 0.77 | 0.63 | 2.34 | 11.00 | 19.00 | 4.09 |
| 5 | 1 | 0.47 | 1 | 0.50 | 0.49 | 1.64 | 4.00 | 6.00 | 1.61 |
| 5 | 2 | 0.58 | 1 | 0.56 | 0.58 | 1.96 | 3.00 | 7.00 | 2.30 |
| 5 | 3 | 0.66 | 1 | 0.61 | 0.62 | 2.13 | 2.00 | 8.00 | 2.71 |
| 5 | 4 | 0.71 | 1 | 0.63 | 0.65 | 2.24 | 1.00 | 9.00 | 3.00 |
| 5 | 5 | 0.77 | 1 | 0.65 | 0.67 | 2.32 | 0.00 | 10.00 | 3.22 |
| 5 | 6 | 0.76 | 1 | 0.67 | 0.68 | 2.38 | 1.00 | 11.00 | 3.40 |
| 5 | 7 | 0.76 | 1 | 0.68 | 0.69 | 2.42 | 2.00 | 12.00 | 3.56 |
| 5 | 8 | 0.74 | 1 | 0.68 | 0.70 | 2.46 | 3.00 | 13.00 | 3.69 |
| 5 | 9 | 0.72 | 1 | 0.71 | 0.69 | 2.45 | 4.00 | 14.00 | 3.81 |
| 5 | 10 | 0.67 | 1 | 0.71 | 0.72 | 2.53 | 5.00 | 15.00 | 3.91 |
| 5 | 11 | 0.67 | 1 | 0.73 | 0.70 | 2.49 | 6.00 | 16.00 | 4.01 |
| 5 | 12 | 0.66 | 1 | 0.74 | 0.68 | 2.45 | 7.00 | 17.00 | 4.09 |
| 5 | 13 | 0.61 | 1 | 0.69 | 0.76 | 2.59 | 8.00 | 18.00 | 4.17 |
| 5 | 14 | 0.62 | 1 | 0.73 | 0.71 | 2.51 | 9.00 | 19.00 | 4.25 |
| 5 | 15 | 0.58 | 1 | 0.79 | 0.64 | 2.41 | 10.00 | 20.00 | 4.32 |
| 6 | 1 | 0.49 | 1 | 0.52 | 0.51 | 1.74 | 5.00 | 7.00 | 1.79 |
| 6 | 2 | 0.59 | 1 | 0.58 | 0.60 | 2.04 | 4.00 | 8.00 | 2.48 |
| 6 | 3 | 0.67 | 1 | 0.62 | 0.64 | 2.20 | 3.00 | 9.00 | 2.89 |
| 6 | 4 | 0.73 | 1 | 0.65 | 0.67 | 2.31 | 2.00 | 10.00 | 3.18 |
| 6 | 5 | 0.76 | 1 | 0.66 | 0.69 | 2.38 | 1.00 | 11.00 | 3.40 |
| 6 | 6 | 0.80 | 1 | 0.68 | 0.70 | 2.45 | 0.00 | 12.00 | 3.58 |
| 6 | 7 | 0.78 | 1 | 0.69 | 0.71 | 2.47 | 1.00 | 13.00 | 3.74 |
| 6 | 8 | 0.77 | 1 | 0.69 | 0.73 | 2.52 | 2.00 | 14.00 | 3.87 |
| 6 | 9 | 0.76 | 1 | 0.72 | 0.71 | 2.51 | 3.00 | 15.00 | 3.99 |
| 6 | 10 | 0.74 | 1 | 0.71 | 0.74 | 2.58 | 4.00 | 16.00 | 4.09 |
| 6 | 11 | 0.72 | 1 | 0.73 | 0.71 | 2.53 | 5.00 | 17.00 | 4.19 |
| 6 | 12 | 0.68 | 1 | 0.74 | 0.70 | 2.50 | 6.00 | 18.00 | 4.28 |
| 6 | 13 | 0.69 | 1 | 0.69 | 0.78 | 2.65 | 7.00 | 19.00 | 4.36 |
| 6 | 14 | 0.66 | 1 | 0.74 | 0.73 | 2.56 | 8.00 | 20.00 | 4.43 |
| 6 | 15 | 0.64 | 1 | 0.79 | 0.66 | 2.45 | 9.00 | 21.00 | 4.50 |
| 7 | 1 | 0.49 | 1 | 0.52 | 0.54 | 1.76 | 6.00 | 8.00 | 1.95 |
| 7 | 2 | 0.59 | 1 | 0.59 | 0.62 | 2.07 | 5.00 | 9.00 | 2.64 |
| 7 | 3 | 0.66 | 1 | 0.63 | 0.65 | 2.23 | 4.00 | 10.00 | 3.04 |
| 7 | 4 | 0.72 | 1 | 0.66 | 0.68 | 2.34 | 3.00 | 11.00 | 3.33 |
| 7 | 5 | 0.76 | 1 | 0.67 | 0.70 | 2.41 | 2.00 | 12.00 | 3.56 |
| 7 | 6 | 0.78 | 1 | 0.69 | 0.71 | 2.47 | 1.00 | 13.00 | 3.74 |
| 7 | 7 | 0.81 | 1 | 0.70 | 0.72 | 2.53 | 0.00 | 14.00 | 3.89 |
| 7 | 8 | 0.80 | 1 | 0.70 | 0.73 | 2.56 | 1.00 | 15.00 | 4.03 |
| 7 | 9 | 0.79 | 1 | 0.73 | 0.71 | 2.55 | 2.00 | 16.00 | 4.14 |
| 7 | 10 | 0.78 | 1 | 0.73 | 0.74 | 2.61 | 3.00 | 17.00 | 4.25 |
| 7 | 11 | 0.76 | 1 | 0.74 | 0.72 | 2.57 | 4.00 | 18.00 | 4.34 |
| 7 | 12 | 0.76 | 1 | 0.76 | 0.70 | 2.55 | 5.00 | 19.00 | 4.43 |
| 7 | 13 | 0.72 | 1 | 0.71 | 0.78 | 2.68 | 6.00 | 20.00 | 4.51 |
| 7 | 14 | 0.66 | 1 | 0.76 | 0.74 | 2.63 | 7.00 | 21.00 | 4.58 |
| 7 | 15 | 0.71 | 1 | 0.81 | 0.66 | 2.50 | 8.00 | 22.00 | 4.65 |
| 8 | 1 | 0.49 | 1 | 0.54 | 0.55 | 1.82 | 7.00 | 9.00 | 2.08 |
| 8 | 2 | 0.57 | 1 | 0.60 | 0.63 | 2.12 | 6.00 | 10.00 | 2.77 |
| 8 | 3 | 0.65 | 1 | 0.64 | 0.66 | 2.27 | 5.00 | 11.00 | 3.18 |
| 8 | 4 | 0.68 | 1 | 0.67 | 0.68 | 2.39 | 4.00 | 12.00 | 3.47 |
| 8 | 5 | 0.74 | 1 | 0.69 | 0.70 | 2.46 | 3.00 | 13.00 | 3.69 |
| 8 | 6 | 0.77 | 1 | 0.71 | 0.71 | 2.53 | 2.00 | 14.00 | 3.87 |
| 8 | 7 | 0.80 | 1 | 0.72 | 0.72 | 2.56 | 1.00 | 15.00 | 4.03 |
| 8 | 8 | 0.81 | 1 | 0.72 | 0.74 | 2.61 | 0.00 | 16.00 | 4.16 |
| 8 | 9 | 0.80 | 1 | 0.75 | 0.72 | 2.60 | 1.00 | 17.00 | 4.28 |
| 8 | 10 | 0.80 | 1 | 0.74 | 0.75 | 2.67 | 2.00 | 18.00 | 4.38 |
| 8 | 11 | 0.78 | 1 | 0.76 | 0.72 | 2.62 | 3.00 | 19.00 | 4.48 |
| 8 | 12 | 0.77 | 1 | 0.78 | 0.71 | 2.60 | 4.00 | 20.00 | 4.56 |
| 8 | 13 | 0.74 | 1 | 0.72 | 0.79 | 2.71 | 5.00 | 21.00 | 4.64 |
| 8 | 14 | 0.72 | 1 | 0.76 | 0.74 | 2.65 | 6.00 | 22.00 | 4.72 |
| 8 | 15 | 0.74 | 1 | 0.82 | 0.67 | 2.56 | 7.00 | 23.00 | 4.79 |
| 9 | 1 | 0.48 | 1 | 0.54 | 0.57 | 1.85 | 8.00 | 10.00 | 2.20 |
| 9 | 2 | 0.57 | 1 | 0.59 | 0.66 | 2.13 | 7.00 | 11.00 | 2.89 |
| 9 | 3 | 0.61 | 1 | 0.63 | 0.69 | 2.28 | 6.00 | 12.00 | 3.30 |
| 9 | 4 | 0.68 | 1 | 0.66 | 0.71 | 2.38 | 5.00 | 13.00 | 3.58 |
| 9 | 5 | 0.72 | 1 | 0.67 | 0.73 | 2.46 | 4.00 | 14.00 | 3.81 |
| 9 | 6 | 0.75 | 1 | 0.69 | 0.74 | 2.52 | 3.00 | 15.00 | 3.99 |
| 9 | 7 | 0.79 | 1 | 0.70 | 0.75 | 2.55 | 2.00 | 16.00 | 4.14 |
| 9 | 8 | 0.80 | 1 | 0.70 | 0.77 | 2.60 | 1.00 | 17.00 | 4.28 |
| 9 | 9 | 0.82 | 1 | 0.73 | 0.75 | 2.62 | 0.00 | 18.00 | 4.39 |
| 9 | 10 | 0.82 | 1 | 0.72 | 0.78 | 2.67 | 1.00 | 19.00 | 4.50 |
| 9 | 11 | 0.82 | 1 | 0.74 | 0.75 | 2.62 | 2.00 | 20.00 | 4.60 |
| 9 | 12 | 0.80 | 1 | 0.76 | 0.73 | 2.59 | 3.00 | 21.00 | 4.68 |
| 9 | 13 | 0.77 | 1 | 0.70 | 0.81 | 2.73 | 4.00 | 22.00 | 4.76 |
| 9 | 14 | 0.79 | 1 | 0.75 | 0.77 | 2.66 | 5.00 | 23.00 | 4.84 |
| 9 | 15 | 0.76 | 1 | 0.80 | 0.69 | 2.53 | 6.00 | 24.00 | 4.91 |
| 10 | 1 | 0.49 | 1 | 0.56 | 0.58 | 1.92 | 9.00 | 11.00 | 2.30 |
| 10 | 2 | 0.53 | 1 | 0.62 | 0.66 | 2.21 | 8.00 | 12.00 | 3.00 |
| 10 | 3 | 0.60 | 1 | 0.66 | 0.68 | 2.36 | 7.00 | 13.00 | 3.40 |
| 10 | 4 | 0.64 | 1 | 0.68 | 0.71 | 2.46 | 6.00 | 14.00 | 3.69 |
| 10 | 5 | 0.67 | 1 | 0.70 | 0.73 | 2.54 | 5.00 | 15.00 | 3.91 |
| 10 | 6 | 0.74 | 1 | 0.72 | 0.73 | 2.59 | 4.00 | 16.00 | 4.09 |
| 10 | 7 | 0.77 | 1 | 0.73 | 0.74 | 2.62 | 3.00 | 17.00 | 4.25 |
| 10 | 8 | 0.80 | 1 | 0.73 | 0.76 | 2.67 | 2.00 | 18.00 | 4.38 |
| 10 | 9 | 0.81 | 1 | 0.76 | 0.74 | 2.67 | 1.00 | 19.00 | 4.50 |
| 10 | 10 | 0.84 | 1 | 0.75 | 0.77 | 2.72 | 0.00 | 20.00 | 4.61 |
| 10 | 11 | 0.82 | 1 | 0.77 | 0.74 | 2.66 | 1.00 | 21.00 | 4.70 |
| 10 | 12 | 0.84 | 1 | 0.79 | 0.72 | 2.65 | 2.00 | 22.00 | 4.79 |
| 10 | 13 | 0.80 | 1 | 0.74 | 0.80 | 2.79 | 3.00 | 23.00 | 4.87 |
| 10 | 14 | 0.81 | 1 | 0.77 | 0.76 | 2.71 | 4.00 | 24.00 | 4.94 |
| 10 | 15 | 0.78 | 1 | 0.83 | 0.68 | 2.61 | 5.00 | 25.00 | 5.01 |
| 11 | 1 | 0.47 | 1 | 0.55 | 0.60 | 1.90 | 10.00 | 12.00 | 2.40 |
| 11 | 2 | 0.54 | 1 | 0.60 | 0.68 | 2.17 | 9.00 | 13.00 | 3.09 |
| 11 | 3 | 0.59 | 1 | 0.64 | 0.71 | 2.31 | 8.00 | 14.00 | 3.50 |
| 11 | 4 | 0.64 | 1 | 0.66 | 0.73 | 2.41 | 7.00 | 15.00 | 3.78 |
| 11 | 5 | 0.67 | 1 | 0.67 | 0.75 | 2.48 | 6.00 | 16.00 | 4.01 |
| 11 | 6 | 0.72 | 1 | 0.69 | 0.76 | 2.53 | 5.00 | 17.00 | 4.19 |
| 11 | 7 | 0.76 | 1 | 0.69 | 0.77 | 2.57 | 4.00 | 18.00 | 4.34 |
| 11 | 8 | 0.78 | 1 | 0.70 | 0.78 | 2.61 | 3.00 | 19.00 | 4.48 |
| 11 | 9 | 0.82 | 1 | 0.72 | 0.76 | 2.59 | 2.00 | 20.00 | 4.60 |
| 11 | 10 | 0.82 | 1 | 0.71 | 0.79 | 2.65 | 1.00 | 21.00 | 4.70 |
| 11 | 11 | 0.85 | 1 | 0.74 | 0.76 | 2.64 | 0.00 | 22.00 | 4.80 |
| 11 | 12 | 0.83 | 1 | 0.75 | 0.74 | 2.55 | 1.00 | 23.00 | 4.88 |
| 11 | 13 | 0.82 | 1 | 0.70 | 0.82 | 2.71 | 2.00 | 24.00 | 4.96 |
| 11 | 14 | 0.83 | 1 | 0.74 | 0.78 | 2.64 | 3.00 | 25.00 | 5.04 |
| 11 | 15 | 0.82 | 1 | 0.79 | 0.70 | 2.49 | 4.00 | 26.00 | 5.11 |
| 12 | 1 | 0.47 | 1 | 0.54 | 0.61 | 1.87 | 11.00 | 13.00 | 2.48 |
| 12 | 2 | 0.51 | 1 | 0.59 | 0.69 | 2.14 | 10.00 | 14.00 | 3.18 |
| 12 | 3 | 0.55 | 1 | 0.63 | 0.72 | 2.28 | 9.00 | 15.00 | 3.58 |
| 12 | 4 | 0.59 | 1 | 0.65 | 0.74 | 2.38 | 8.00 | 16.00 | 3.87 |
| 12 | 5 | 0.66 | 1 | 0.66 | 0.76 | 2.44 | 7.00 | 17.00 | 4.09 |
| 12 | 6 | 0.68 | 1 | 0.67 | 0.77 | 2.50 | 6.00 | 18.00 | 4.28 |
| 12 | 7 | 0.76 | 1 | 0.68 | 0.78 | 2.54 | 5.00 | 19.00 | 4.43 |
| 12 | 8 | 0.77 | 1 | 0.69 | 0.79 | 2.58 | 4.00 | 20.00 | 4.56 |
| 12 | 9 | 0.80 | 1 | 0.71 | 0.77 | 2.56 | 3.00 | 21.00 | 4.68 |
| 12 | 10 | 0.84 | 1 | 0.70 | 0.80 | 2.62 | 2.00 | 22.00 | 4.79 |
| 12 | 11 | 0.83 | 1 | 0.72 | 0.76 | 2.54 | 1.00 | 23.00 | 4.88 |
| 12 | 12 | 0.86 | 1 | 0.75 | 0.76 | 2.59 | 0.00 | 24.00 | 4.97 |
| 12 | 13 | 0.83 | 1 | 0.69 | 0.83 | 2.66 | 1.00 | 25.00 | 5.05 |
| 12 | 14 | 0.85 | 1 | 0.73 | 0.79 | 2.65 | 2.00 | 26.00 | 5.12 |
| 12 | 15 | 0.83 | 1 | 0.78 | 0.71 | 2.52 | 3.00 | 27.00 | 5.19 |
| 13 | 1 | 0.44 | 1 | 0.57 | 0.59 | 1.95 | 12.00 | 14.00 | 2.56 |
| 13 | 2 | 0.48 | 1 | 0.64 | 0.66 | 2.26 | 11.00 | 15.00 | 3.26 |
| 13 | 3 | 0.53 | 1 | 0.70 | 0.67 | 2.42 | 10.00 | 16.00 | 3.66 |
| 13 | 4 | 0.56 | 1 | 0.72 | 0.70 | 2.52 | 9.00 | 17.00 | 3.95 |
| 13 | 5 | 0.61 | 1 | 0.74 | 0.71 | 2.60 | 8.00 | 18.00 | 4.17 |
| 13 | 6 | 0.69 | 1 | 0.76 | 0.72 | 2.65 | 7.00 | 19.00 | 4.36 |
| 13 | 7 | 0.72 | 1 | 0.76 | 0.73 | 2.67 | 6.00 | 20.00 | 4.51 |
| 13 | 8 | 0.74 | 1 | 0.77 | 0.74 | 2.72 | 5.00 | 21.00 | 4.64 |
| 13 | 9 | 0.77 | 1 | 0.80 | 0.72 | 2.72 | 4.00 | 22.00 | 4.76 |
| 13 | 10 | 0.80 | 1 | 0.78 | 0.75 | 2.78 | 3.00 | 23.00 | 4.87 |
| 13 | 11 | 0.82 | 1 | 0.81 | 0.72 | 2.73 | 2.00 | 24.00 | 4.96 |
| 13 | 12 | 0.82 | 1 | 0.82 | 0.70 | 2.69 | 1.00 | 25.00 | 5.05 |
| 13 | 13 | 0.86 | 1 | 0.78 | 0.79 | 2.83 | 0.00 | 26.00 | 5.13 |
| 13 | 14 | 0.84 | 1 | 0.80 | 0.75 | 2.76 | 1.00 | 27.00 | 5.20 |
| 13 | 15 | 0.83 | 1 | 0.86 | 0.68 | 2.67 | 2.00 | 28.00 | 5.27 |
| 14 | 1 | 0.46 | 1 | 0.52 | 0.64 | 1.82 | 13.00 | 15.00 | 2.64 |
| 14 | 2 | 0.49 | 1 | 0.59 | 0.71 | 2.14 | 12.00 | 16.00 | 3.33 |
| 14 | 3 | 0.55 | 1 | 0.64 | 0.72 | 2.30 | 11.00 | 17.00 | 3.74 |
| 14 | 4 | 0.56 | 1 | 0.67 | 0.75 | 2.42 | 10.00 | 18.00 | 4.03 |
| 14 | 5 | 0.62 | 1 | 0.68 | 0.76 | 2.48 | 9.00 | 19.00 | 4.25 |
| 14 | 6 | 0.65 | 1 | 0.70 | 0.76 | 2.54 | 8.00 | 20.00 | 4.43 |
| 14 | 7 | 0.65 | 1 | 0.71 | 0.78 | 2.61 | 7.00 | 21.00 | 4.58 |
| 14 | 8 | 0.71 | 1 | 0.72 | 0.79 | 2.65 | 6.00 | 22.00 | 4.72 |
| 14 | 9 | 0.78 | 1 | 0.75 | 0.76 | 2.65 | 5.00 | 23.00 | 4.84 |
| 14 | 10 | 0.80 | 1 | 0.73 | 0.79 | 2.69 | 4.00 | 24.00 | 4.94 |
| 14 | 11 | 0.82 | 1 | 0.76 | 0.76 | 2.64 | 3.00 | 25.00 | 5.04 |
| 14 | 12 | 0.84 | 1 | 0.78 | 0.75 | 2.64 | 2.00 | 26.00 | 5.12 |
| 14 | 13 | 0.83 | 1 | 0.73 | 0.82 | 2.75 | 1.00 | 27.00 | 5.20 |
| 14 | 14 | 0.86 | 1 | 0.77 | 0.79 | 2.77 | 0.00 | 28.00 | 5.28 |
| 14 | 15 | 0.85 | 1 | 0.81 | 0.72 | 2.65 | 1.00 | 29.00 | 5.35 |
| 15 | 1 | 0.46 | 1 | 0.52 | 0.66 | 1.83 | 14.00 | 16.00 | 2.71 |
| 15 | 2 | 0.50 | 1 | 0.56 | 0.74 | 2.10 | 13.00 | 17.00 | 3.40 |
| 15 | 3 | 0.51 | 1 | 0.59 | 0.77 | 2.24 | 12.00 | 18.00 | 3.81 |
| 15 | 4 | 0.57 | 1 | 0.61 | 0.79 | 2.32 | 11.00 | 19.00 | 4.09 |
| 15 | 5 | 0.58 | 1 | 0.62 | 0.82 | 2.40 | 10.00 | 20.00 | 4.32 |
| 15 | 6 | 0.64 | 1 | 0.63 | 0.82 | 2.43 | 9.00 | 21.00 | 4.50 |
| 15 | 7 | 0.71 | 1 | 0.64 | 0.83 | 2.47 | 8.00 | 22.00 | 4.65 |
| 15 | 8 | 0.74 | 1 | 0.65 | 0.84 | 2.54 | 7.00 | 23.00 | 4.79 |
| 15 | 9 | 0.75 | 1 | 0.66 | 0.82 | 2.51 | 6.00 | 24.00 | 4.91 |
| 15 | 10 | 0.78 | 1 | 0.65 | 0.85 | 2.57 | 5.00 | 25.00 | 5.01 |
| 15 | 11 | 0.82 | 1 | 0.67 | 0.81 | 2.48 | 4.00 | 26.00 | 5.11 |
| 15 | 12 | 0.83 | 1 | 0.69 | 0.80 | 2.50 | 3.00 | 27.00 | 5.19 |
| 15 | 13 | 0.83 | 1 | 0.66 | 0.87 | 2.64 | 2.00 | 28.00 | 5.27 |
| 15 | 14 | 0.85 | 1 | 0.70 | 0.83 | 2.64 | 1.00 | 29.00 | 5.35 |
| 15 | 15 | 0.88 | 1 | 0.75 | 0.78 | 2.60 | 0.00 | 30.00 | 5.42 |

1. † Hongjie Yu. E-mail: yhj@fudan.edu.cn [↑](#footnote-ref-1)
